# Supplementary material for: Recombinant phospholipase A1 (Ves v 1) from yellow jacket venom for improved diagnosis of hymenoptera venom hypersensitivity
Source: Springer Nature journal article supplement (doi:10.1186/1476-7961-8-7), 2010-04-01
Supplement: Additional file 4 [file 1476-7961-8-7-s4.doc]

| double-positive | | | | | YJV positive | | | | |
| --- | --- | --- | --- | --- | --- | --- | --- | --- | --- |
| No. | HBV (i1)  (kU/L) | YJV(i3)  (kU/L) | Ves v 1 sIgE | Ves v 5 sIgE | No. | HBV (i1)  (kU/L) | YJV (i3)  (kU/L) | Ves v 1 sIgE | Ves v 5 sIgE |
| 1 | >100 | 20.5 | + | - | 1 | <0.1 | class 4 | ++ | ++ |
| 2 | 6 | 56 | + | + | 2 | <0.1 | >100 | ++ | ++ |
| 3 | >100 | 6.72 | - | ++ | 3 | <0.1 | class 2 | + | + |
| 4 | 20.5 | 1.41 | + | + | 4 | <0.1 | 43.7 | ++ | ++ |
| 5 | 5.2 | 17.9 | + | + | 5 | <0.1 | 5.93 | - | + |
| 6 | 20.6 | 0.56 | - | - | 6 | <0.1 | 8.69 | + | ++ |
| 7 | 0.81 | 18.4 | ++ | + | 7 | <0.1 | 19.4 | ++ | - |
| 8 | 4.04 | 33.4 | + | ++ | 8 | <0.1 | 27 | - | ++ |
| 9 | 0.22 | 16.9 | + | - | 9 | <0.1 | 23.5 | ++ | ++ |
| 10 | 12.6 | 0.56 | - | - | 10 | <0.1 | 75.5 | + | - |
| 11 | 9.93 | 96.2 | ++ | ++ | 11 | <0.1 | 9.61 | + | - |
| 12 | 17.7 | 7.65 | - | - | 12 | <0.1 | 0.46 | - | - |
| 13 | 10.9 | 11.9 | + | - | 13 | <0.1 | 3.25 | + | + |
| 14 | >100 | 1.16 | - | - | 14 | <0.1 | 21.3 | ++ | - |
| 15 | n.d | 4.23 | + | + |  |  |  |  |  |
| 16 | n.d | 10.3 | + | - |  |  |  |  |  |
| 17 | n.d | 1.36 | + | - |  |  |  |  |  |
| 18 | 5.54 | 6.76 | + | ++ |  |  |  |  |  |
| 19 | 0.31 | 30.8 | ++ | + |  |  |  |  |  |
| 20 | 3.86 | 14.1 | + | + |  |  |  |  |  |
